# Supplementary material
Source: publisher figshare collection journal article supplement (https://tandf.figshare.com/ndownloader/files/36574052)
Supplement: Supplementary file 1 [file 36574052]

JBI critical appraisal tool for descriptive studies included in the Pooled analysis

Q1. Were patient’s demographic characteristics clearly described?

Q2. Was the patient’s history clearly described and presented as a timeline?

Q3. Was the current clinical condition of the patient on presentation clearly described?

Q4. Were diagnostic tests or methods and the results clearly described?

Q5. Was the intervention(s) or treatment procedure(s) clearly described?

Q6. Was the post-intervention clinical condition clearly described?

Q7. Were adverse events (harms) or unanticipated events identified and described?

Q8. Does the case report provide takeaway lessons?

Answers:

Not applicable = 0

Yes=1

No=2

Unclear= 3

Table 1a

| p\reference | P_ID | A_1D | A to Q1 | A to Q2 | A to Q3 | A to Q4 | A to Q5 | A to Q6 | A to Q7 | A to Q8 |
| --- | --- | --- | --- | --- | --- | --- | --- | --- | --- | --- |
| 1 (1) | 00101 | 1 | 1 | 1 | 1 | 1 | 1 | 2 | 2 | 1 |
| 2 (1) | 00102 | 1 | 1 | 1 | 1 | 1 | 1 | 2 | 2 | 1 |
| 3 (1) | 00103 | 1 | 1 | 1 | 1 | 1 | 1 | 2 | 2 | 1 |
| 4 (1) | 00104 | 1 | 1 | 1 | 1 | 1 | 1 | 2 | 2 | 1 |
| 5 (1) | 00105 | 1 | 1 | 1 | 1 | 1 | 1 | 2 | 2 | 1 |
| 6 (1) | 00106 | 1 | 1 | 1 | 1 | 1 | 1 | 2 | 2 | 1 |
| 7 (1) | 00107 | 1 | 1 | 1 | 1 | 1 | 1 | 2 | 2 | 1 |
| 8 (2) | 00201 | 2 | 1 | 2 | 1 | 1 | 1 | 1 | 2 | 1 |
| 9 (3) | 00601 | 6 | 1 | 2 | 1 | 1 | 1 | 3 | 2 | 1 |
| 10 (4) | 01701 | 17 | 1 | 1 | 1 | 1 | 2 | 1 | 2 | 1 |
| 11 (5) | 01901 | 19 | 1 | 1 | 1 | 1 | 1 | 2 | 2 | 1 |
| 12 (6) | 02001 | 20 | 1 | 1 | 1 | 1 | 2 | 1 | 2 | 1 |
| 13 (7) | 02301 | 23 | 1 | 1 | 1 | 1 | 2 | 2 | 2 | 1 |
| 14 (8) | 02401 | 24 | 1 | 1 | 1 | 1 | 1 | 2 | 2 | 1 |
| 15 (9) | 02501 | 25 | 1 | 1 | 1 | 1 | 1 | 2 | 2 | 1 |
| 16 (10) | 02901 | 29 | 1 | 1 | 1 | 2 | 2 | 2 | 2 | 1 |
| 17 (11) | 03001 | 30 | 1 | 1 | 1 | 1 | 1 | 2 | 2 | 1 |
| 18 (12) | 03401 | 34 | 1 | 1 | 1 | 1 | 1 | 2 | 2 | 1 |
| 19 (12) | 03404 | 34 | 1 | 1 | 1 | 1 | 1 | 2 | 2 | 1 |
| 20 (12) | 03405 | 34 | 1 | 1 | 1 | 2 | 1 | 2 | 1 | 1 |
| 21 (13) | 03701 | 37 | 1 | 1 | 1 | 1 | 2 | 1 | 1 | 1 |
| 22 (14) | 04101 | 41 | 1 | 1 | 1 | 2 | 1 | 2 | 1 | 2 |
| 23 (15) | 04401 | 44 | 1 | 1 | 1 | 1 | 2 | 2 | 1 | 1 |
| 24 (16) | 04501 | 45 | 1 | 1 | 1 | 2 | 2 | 2 | 1 | 2 |
| 25 (17) | 04601 | 46 | 1 | 1 | 1 | 1 | 2 | 1 | 1 | 1 |
| 26 (18) | 04701 | 47 | 1 | 1 | 1 | 1 | 2 | 2 | 2 | 1 |
| 27 (19) | 05401 | 54 | 1 | 1 | 1 | 2 | 2 | 1 | 2 | 1 |
| 28 (20) | 05501 | 55 | 1 | 1 | 1 | 1 | 1 | 1 | 1 | 1 |
| 29 (21) | 05701 | 57 | 1 | 1 | 1 | 1 | 1 | 2 | 2 | 1 |
| 30 (22) | 06001 | 60 | 1 | 1 | 1 | 1 | 1 | 2 | 2 | 1 |
| 31 (23) | 06701 | 67 | 1 | 1 | 1 | 1 | 1 | 2 | 2 | 1 |
| 32 (24) | 07201 | 72 | 1 | 1 | 1 | 1 | 2 | 2 | 2 | 1 |
| 33 (25) | 07301 | 73 | 1 | 1 | 1 | 1 | 1 | 2 | 2 | 1 |
| 34 (26) | 07501 | 75 | 1 | 1 | 1 | 1 | 1 | 2 | 2 | 1 |
| 35 (27) | 07801 | 78 | 1 | 1 | 1 | 1 | 2 | 2 | 2 | 1 |
| 36 (28) | 08001 | 80 | 1 | 1 | 1 | 1 | 1 | 2 | 2 | 1 |
| 37 (29) | 08201 | 82 | 1 | 1 | 1 | 1 | 1 | 2 | 2 | 1 |
| 38 (30) | 08401 | 84 | 1 | 1 | 1 | 1 | 2 | 2 | 2 | 1 |
| 39 (31) | 08601 | 86 | 1 | 1 | 1 | 1 | 1 | 2 | 2 | 1 |
| 40 (32) | 08701 | 87 | 1 | 1 | 1 | 1 | 1 | 2 | 2 | 1 |
| 41 (33) | 08801 | 88 | 1 | 1 | 1 | 1 | 2 | 2 | 2 | 1 |
| 42 (33) | 08802 | 88 | 1 | 1 | 1 | 1 | 2 | 2 | 2 | 1 |
| 43 (33) | 08805 | 88 | 1 | 1 | 1 | 1 | 2 | 2 | 2 | 1 |
| 44 (33) | 08806 | 88 | 1 | 1 | 1 | 2 | 2 | 1 | 2 | 1 |
| 45 (33) | 08807 | 88 | 1 | 1 | 1 | 2 | 1 | 2 | 2 | 1 |
| 46 (33) | 08809 | 88 | 1 | 1 | 1 | 1 | 2 | 2 | 2 | 1 |
| 47 (33) | 08811 | 88 | 1 | 1 | 1 | 1 | 2 | 2 | 2 | 1 |
| 48 (33) | 08812 | 88 | 1 | 1 | 1 | 1 | 2 | 2 | 2 | 1 |
| 49 (33) | 08813 | 88 | 1 | 1 | 1 | 1 | 2 | 2 | 2 | 1 |
| 50 (34) | 09101 | 91 | 1 | 1 | 1 | 1 | 2 | 2 | 2 | 1 |
| 51 (35) | 09401 | 94 | 1 | 1 | 1 | 2 | 2 | 2 | 2 | 1 |
| 52 (36) | 10301 | 103 | 1 | 1 | 1 | 1 | 1 | 2 | 2 | 1 |
| 53 (37) | 10401 | 104 | 1 | 1 | 1 | 1 | 2 | 2 | 2 | 1 |
| 54 (38) | 10803 | 108 | 1 | 1 | 1 | 1 | 2 | 2 | 2 | 1 |
| 55 (38) | 10805 | 108 | 1 | 2 | 1 | 1 | 2 | 2 | 1 | 3 |
| 56 (38) | 10807 | 108 | 1 | 1 | 1 | 1 | 2 | 2 | 1 | 1 |
| 57 (39) | 11301 | 113 | 1 | 1 | 1 | 1 | 1 | 2 | 2 | 1 |
| 58 (40) | 12201 | 122 | 1 | 1 | 1 | 1 | 2 | 2 | 2 | 1 |
| 59 (41) | 12301 | 123 | 1 | 1 | 1 | 1 | 1 | 2 | 2 | 1 |
| 60 (42) | 12601 | 126 | 1 | 1 | 1 | 1 | 2 | 2 | 2 | 1 |
| 61 (43) | 12701 | 127 | 1 | 1 | 1 | 1 | 1 | 2 | 2 | 1 |
| 62 (44) | 13001 | 130 | 1 | 1 | 1 | 1 | 2 | 2 | 2 | 1 |
| 63 (45) | 13101 | 131 | 1 | 1 | 1 | 1 | 2 | 2 | 2 | 1 |
| 64 (46) | 13201 | 132 | 1 | 1 | 1 | 1 | 1 | 2 | 2 | 1 |
| 65 (47) | 14401 | 144 | 1 | 1 | 1 | 1 | 2 | 2 | 2 | 1 |
| 66 (48) | 15101 | 151 | 1 | 1 | 1 | 1 | 1 | 2 | 2 | 1 |
| 67 (49) | 15601 | 156 | 1 | 1 | 1 | 1 | 2 | 2 | 2 | 1 |
| 68 (50) | 15801 | 158 | 1 | 1 | 1 | 1 | 2 | 2 | 2 | 1 |
| 69 (51) | 16401 | 164 | 1 | 1 | 1 | 1 | 3 | 2 | 2 | 1 |
| 70 (51) | 16402 | 164 | 1 | 1 | 1 | 1 | 2 | 2 | 2 | 1 |
| 71 (51) | 16403 | 164 | 1 | 1 | 1 | 1 | 2 | 2 | 2 | 1 |
| 72 (51) | 16404 | 164 | 1 | 1 | 1 | 1 | 2 | 2 | 2 | 1 |
| 73 (51) | 16405 | 164 | 1 | 1 | 1 | 1 | 2 | 2 | 2 | 1 |
| 74 (51) | 16406 | 164 | 1 | 1 | 1 | 1 | 2 | 2 | 2 | 1 |
| 75 (51) | 16407 | 164 | 1 | 1 | 1 | 1 | 2 | 2 | 2 | 1 |
| 76 (51) | 16408 | 164 | 1 | 1 | 1 | 1 | 2 | 2 | 2 | 1 |
| 77 (51) | 16409 | 164 | 1 | 1 | 1 | 1 | 2 | 2 | 3 | 1 |
| 78 (51) | 16411 | 164 | 1 | 1 | 1 | 1 | 2 | 2 | 2 | 1 |
| 79 (51) | 16411 | 164 | 1 | 1 | 1 | 1 | 2 | 2 | 2 | 1 |
| 80 (51) | 16413 | 164 | 1 | 1 | 1 | 1 | 2 | 2 | 2 | 1 |
| 81 (51) | 16414 | 164 | 1 | 1 | 1 | 1 | 2 | 2 | 2 | 1 |
| 82 (51) | 16415 | 164 | 1 | 1 | 1 | 1 | 2 | 2 | 2 | 1 |
| 83 (51) | 16416 | 164 | 1 | 1 | 1 | 1 | 2 | 2 | 2 | 1 |
| 84 (51) | 16417 | 164 | 1 | 1 | 1 | 1 | 2 | 2 | 2 | 1 |
| 85 (52) | 16501 | 165 | 1 | 1 | 1 | 1 | 1 | 2 | 2 | 1 |
| 86 (53) | 16701 | 167 | 1 | 1 | 1 | 1 | 2 | 2 | 2 | 1 |
| 87 (54) | 17101 | 171 | 1 | 1 | 1 | 1 | 2 | 2 | 2 | 1 |
| 88 (55) | 17201 | 172 | 1 | 1 | 1 | 1 | 2 | 2 | 2 | 1 |
| 89 (55) | 17202 | 172 | 1 | 1 | 1 | 1 | 2 | 2 | 2 | 1 |
| 90 (56) | 17601 | 176 | 1 | 1 | 1 | 1 | 3 | 2 | 2 | 1 |
| 91 (57) | 18101 | 181 | 1 | 1 | 1 | 1 | 2 | 2 | 2 | 1 |
| 92 (58) | 18403 | 184 | 1 | 1 | 1 | 1 | 2 | 2 | 2 | 1 |
| 93 (59) | 18601 | 186 | 1 | 1 | 1 | 1 | 2 | 2 | 2 | 1 |
| 94 (60) | 19301 | 193 | 1 | 1 | 1 | 1 | 2 | 2 | 2 | 1 |
| 95 (61) | 19401 | 194 | 1 | 1 | 1 | 1 | 2 | 2 | 2 | 1 |
| 96 (61) | 19402 | 194 | 1 | 1 | 1 | 1 | 2 | 2 | 2 | 1 |
| 97 (62) | 19601 | 196 | 1 | 1 | 1 | 1 | 2 | 2 | 2 | 1 |
| 98 (63) | 19701 | 197 | 1 | 1 | 1 | 1 | 2 | 2 | 2 | 1 |
| 99 (64) | 19901 | 199 | 1 | 1 | 1 | 1 | 2 | 2 | 2 | 1 |
| 100 (65) | 20501 | 205 | 1 | 1 | 1 | 1 | 1 | 2 | 2 | 1 |
| 101 (66) | 20901 | 209 | 1 | 1 | 1 | 2 | 1 | 2 | 2 | 1 |
| 102 (67) | 21001 | 210 | 1 | 1 | 1 | 1 | 2 | 2 | 2 | 1 |
| 103 (68) | 21301 | 213 | 1 | 1 | 3 | 1 | 2 | 2 | 2 | 1 |
| 104 (69) | 21701 | 217 | 1 | 1 | 1 | 1 | 1 | 2 | 2 | 1 |
| 105 (70) | 22001 | 220 | 1 | 1 | 1 | 1 | 2 | 2 | 2 | 1 |
| 106 (71) | 22101 | 221 | 1 | 1 | 1 | 1 | 2 | 3 | 2 | 1 |
| 107 (72) | 22601 | 226 | 1 | 1 | 1 | 1 | 2 | 2 | 2 | 1 |
| 108 (73) | 23401 | 234 | 1 | 1 | 1 | 1 | 2 | 2 | 2 | 1 |
| 109 (74) | 24101 | 241 | 1 | 1 | 1 | 1 | 1 | 2 | 2 | 2 |
| 110 (74) | 24102 | 241 | 1 | 1 | 1 | 1 | 1 | 2 | 2 | 2 |
| 111 (74) | 24103 | 241 | 1 | 1 | 1 | 1 | 1 | 2 | 2 | 2 |
| 112 (74) | 24104 | 241 | 1 | 1 | 1 | 1 | 1 | 2 | 2 | 2 |
| 113 (74) | 24105 | 241 | 1 | 1 | 1 | 1 | 1 | 2 | 2 | 2 |
| 114 (74) | 24106 | 241 | 1 | 1 | 1 | 1 | 1 | 2 | 2 | 2 |
| 115 (74) | 24107 | 241 | 1 | 1 | 1 | 1 | 1 | 2 | 2 | 2 |
| 116 (74) | 24108 | 241 | 1 | 1 | 1 | 1 | 1 | 2 | 2 | 2 |
| 117 (74) | 24109 | 241 | 1 | 1 | 1 | 1 | 1 | 2 | 2 | 2 |
| 118 (74) | 24110 | 241 | 1 | 1 | 1 | 1 | 1 | 3 | 3 | 2 |
| 119 (74) | 24111 | 241 | 1 | 1 | 1 | 1 | 1 | 2 | 2 | 2 |
| 120 (74) | 24112 | 241 | 1 | 1 | 1 | 1 | 1 | 2 | 2 | 2 |
| 121 (74) | 24113 | 241 | 1 | 1 | 1 | 1 | 1 | 2 | 2 | 2 |
| 122 (75) | 24201 | 242 | 1 | 1 | 1 | 1 | 2 | 2 | 2 | 1 |
| 123 (76) | 24301 | 243 | 1 | 1 | 1 | 1 | 1 | 2 | 2 | 1 |
| 124 (77) | 24601 | 246 | 1 | 1 | 1 | 1 | 1 | 2 | 2 | 1 |
| 125 (78) | 24701 | 247 | 1 | 1 | 1 | 1 | 2 | 2 | 1 | 1 |
| 126 (78) | 24702 | 247 | 1 | 1 | 1 | 1 | 2 | 2 | 1 | 1 |
| 127 (78) | 24703 | 247 | 1 | 1 | 1 | 1 | 2 | 2 | 1 | 1 |
| 128 (78) | 24704 | 247 | 1 | 1 | 1 | 1 | 2 | 2 | 1 | 1 |
| 129 (78) | 24705 | 247 | 1 | 1 | 1 | 1 | 2 | 2 | 2 | 1 |
| 130 (78) | 24706 | 247 | 1 | 1 | 1 | 1 | 3 | 2 | 1 | 1 |
| 131 (78) | 24707 | 247 | 1 | 1 | 1 | 1 | 2 | 2 | 1 | 1 |
| 132 (78) | 24708 | 247 | 1 | 1 | 1 | 1 | 2 | 2 | 1 | 1 |
| 133 (78) | 24709 | 247 | 1 | 1 | 1 | 1 | 2 | 2 | 1 | 1 |
| 134 (78) | 24710 | 247 | 1 | 1 | 1 | 1 | 2 | 2 | 1 | 1 |
| 135 (78) | 24711 | 247 | 1 | 1 | 1 | 1 | 2 | 2 | 1 | 1 |
| 136 (79) | 25201 | 252 | 1 | 1 | 1 | 1 | 2 | 2 | 2 | 1 |
| 137 (79) | 25202 | 252 | 1 | 1 | 1 | 1 | 2 | 2 | 3 | 1 |
| 138 (79) | 25203 | 252 | 1 | 1 | 1 | 1 | 2 | 2 | 2 | 1 |
| 139 (80) | 25701 | 257 | 1 | 1 | 1 | 1 | 1 | 2 | 2 | 1 |
| 140 (81) | 25801 | 258 | 1 | 1 | 1 | 1 | 1 | 2 | 2 | 1 |
| 141 (82) | 26301 | 263 | 1 | 1 | 1 | 1 | 2 | 2 | 2 | 1 |
| 142 (83) | 26701 | 267 | 1 | 1 | 1 | 1 | 2 | 2 | 2 | 1 |
| 143 (83) | 26702 | 267 | 1 | 1 | 1 | 1 | 2 | 3 | 2 | 1 |
| 144 (83) | 26703 | 267 | 1 | 1 | 1 | 1 | 2 | 2 | 2 | 1 |
| 145 (83) | 26704 | 267 | 1 | 1 | 1 | 1 | 2 | 2 | 2 | 1 |
| 146 (83) | 26705 | 267 | 1 | 1 | 1 | 1 | 2 | 2 | 2 | 1 |
| 147 (83) | 26706 | 267 | 1 | 1 | 1 | 1 | 2 | 2 | 2 | 1 |
| 148 (83) | 26707 | 267 | 1 | 1 | 1 | 1 | 2 | 2 | 2 | 1 |
| 149 (83) | 26708 | 267 | 1 | 1 | 1 | 1 | 2 | 2 | 2 | 1 |
| 150 (83) | 26709 | 267 | 1 | 1 | 1 | 1 | 2 | 2 | 2 | 1 |
| 151 (83) | 26710 | 267 | 1 | 1 | 1 | 1 | 3 | 2 | 2 | 1 |
| 152 (83) | 26711 | 267 | 1 | 1 | 1 | 1 | 2 | 2 | 2 | 1 |
| 153 (83) | 26712 | 267 | 1 | 1 | 1 | 1 | 2 | 2 | 2 | 1 |
| 154 (83) | 26713 | 267 | 1 | 1 | 1 | 1 | 1 | 1 | 1 | 1 |
| 155 (83) | 26714 | 267 | 1 | 1 | 1 | 1 | 1 | 1 | 1 | 1 |
| 156 (83) | 26715 | 267 | 1 | 1 | 1 | 1 | 2 | 2 | 2 | 1 |
| 157 (83) | 26716 | 267 | 1 | 1 | 1 | 1 | 2 | 2 | 2 | 1 |
| 158 (83) | 26717 | 267 | 1 | 1 | 1 | 1 | 2 | 2 | 2 | 1 |
| 159 (83) | 26718 | 267 | 1 | 1 | 1 | 1 | 2 | 2 | 2 | 1 |
| 160 (83) | 26719 | 267 | 1 | 1 | 1 | 1 | 2 | 2 | 2 | 1 |
| 161 (83) | 26720 | 267 | 1 | 1 | 1 | 1 | 3 | 2 | 3 | 1 |
| 162 (84) | 26801 | 268 | 1 | 1 | 1 | 1 | 2 | 2 | 2 | 1 |
| 163 (85) | 27301 | 273 | 1 | 1 | 1 | 1 | 2 | 2 | 2 | 1 |
| 164 (86) | 27601 | 276 | 1 | 1 | 1 | 1 | 2 | 2 | 2 | 1 |
| 165 (87) | 27701 | 277 | 1 | 1 | 1 | 1 | 2 | 2 | 2 | 1 |
| 166 (88) | 28201 | 282 | 1 | 1 | 1 | 1 | 2 | 2 | 2 | 1 |
| 167 (89) | 28301 | 283 | 1 | 1 | 1 | 1 | 2 | 2 | 2 | 1 |
| 168 (89) | 28302 | 283 | 1 | 1 | 1 | 1 | 2 | 2 | 2 | 1 |
| 169 (89) | 28303 | 283 | 1 | 1 | 1 | 1 | 2 | 2 | 2 | 1 |
| 170 (89) | 28304 | 283 | 1 | 1 | 1 | 1 | 2 | 2 | 2 | 1 |
| 171 (90) | 28601 | 286 | 1 | 1 | 1 | 1 | 2 | 2 | 2 | 1 |
| 172 (91) | 28801 | 288 | 1 | 1 | 1 | 1 | 2 | 2 | 2 | 1 |
| 173 (92) | 28901 | 289 | 1 | 1 | 1 | 1 | 2 | 2 | 2 | 1 |
| 174 (93) | 29201 | 292 | 1 | 1 | 1 | 1 | 3 | 2 | 2 | 1 |
| 175 (94) | 29301 | 293 | 1 | 1 | 1 | 1 | 2 | 2 | 2 | 1 |
| 176 (95) | 31101 | 311 | 1 | 1 | 1 | 1 | 2 | 2 | 2 | 1 |
| 177 (96) | 31301 | 313 | 1 | 1 | 1 | 1 | 2 | 2 | 2 | 1 |
| 178 (96) | 31302 | 313 | 1 | 1 | 1 | 1 | 2 | 2 | 2 | 1 |
| 179 (97) | 31401 | 314 | 1 | 1 | 1 | 1 | 2 | 2 | 2 | 1 |
| 180 (98) | 31801 | 318 | 1 | 1 | 1 | 1 | 2 | 2 | 2 | 1 |
| 181 (98) | 31802 | 318 | 1 | 1 | 1 | 1 | 2 | 2 | 2 | 1 |
| 182 (98) | 31803 | 318 | 1 | 1 | 1 | 1 | 2 | 2 | 2 | 1 |
| 183 (98) | 31804 | 318 | 1 | 1 | 1 | 1 | 2 | 2 | 2 | 1 |
| 184 (98) | 31805 | 318 | 1 | 1 | 1 | 1 | 2 | 2 | 2 | 1 |
| 185 (98) | 31806 | 318 | 1 | 1 | 1 | 1 | 2 | 2 | 2 | 1 |
| 186 (98) | 31807 | 318 | 1 | 1 | 1 | 1 | 2 | 2 | 2 | 1 |
| 187 (98) | 31808 | 318 | 1 | 1 | 1 | 1 | 2 | 2 | 2 | 1 |
| 188 (98) | 31809 | 318 | 1 | 1 | 1 | 1 | 1 | 2 | 2 | 1 |
| 189 (98) | 31810 | 318 | 1 | 1 | 1 | 1 | 2 | 2 | 2 | 1 |
| 190 (98) | 31811 | 318 | 1 | 1 | 1 | 1 | 2 | 2 | 2 | 1 |
| 191 (98) | 31812 | 318 | 1 | 1 | 1 | 1 | 1 | 2 | 2 | 2 |
| 192 (98) | 31813 | 318 | 1 | 1 | 1 | 1 | 2 | 2 | 2 | 1 |
| 193 (98) | 31814 | 318 | 1 | 1 | 1 | 1 | 2 | 2 | 2 | 1 |
| 194 (98) | 31815 | 318 | 1 | 1 | 1 | 1 | 2 | 2 | 2 | 1 |
| 195 (98) | 31816 | 318 | 1 | 1 | 1 | 1 | 2 | 2 | 2 | 1 |
| 196 (98) | 31817 | 318 | 1 | 1 | 1 | 1 | 2 | 2 | 2 | 1 |
| 197 (98) | 31818 | 318 | 1 | 1 | 1 | 1 | 2 | 2 | 2 | 1 |
| 198 (98) | 31819 | 318 | 1 | 1 | 1 | 1 | 2 | 2 | 2 | 1 |
| 199 (98) | 31820 | 318 | 1 | 1 | 1 | 1 | 2 | 2 | 2 | 1 |
| 200 (98) | 31821 | 318 | 1 | 1 | 1 | 1 | 2 | 2 | 2 | 1 |
| 201 (98) | 31822 | 318 | 1 | 1 | 1 | 1 | 2 | 2 | 2 | 1 |
| 202 (99) | 32001 | 320 | 1 | 1 | 1 | 1 | 2 | 2 | 2 | 1 |
| 203 (100) | 32101 | 321 | 1 | 1 | 1 | 1 | 2 | 2 | 2 | 1 |
| 204 (101) | 32901 | 329 | 1 | 1 | 1 | 1 | 2 | 2 | 2 | 1 |
| 205 (102) | 33801 | 338 | 1 | 1 | 1 | 1 | 2 | 2 | 2 | 1 |
| 206 (103) | 33901 | 339 | 1 | 1 | 1 | 1 | 2 | 2 | 2 | 1 |
| 207 (104) | 34201 | 342 | 1 | 1 | 1 | 1 | 2 | 2 | 2 | 1 |
| 208 (105) | 35201 | 352 | 1 | 1 | 1 | 1 | 2 | 2 | 2 | 1 |
| 209 (106) | 35301 | 353 | 1 | 1 | 1 | 1 | 2 | 2 | 2 | 1 |
| 210 (107) | 36001 | 360 | 1 | 1 | 1 | 1 | 2 | 2 | 2 | 1 |
| 211 (108) | 36401 | 364 | 1 | 1 | 1 | 1 | 2 | 2 | 2 | 1 |
| 212 (109) | 37301 | 373 | 1 | 1 | 1 | 1 | 2 | 2 | 2 | 1 |
| 213 (110) | 37401 | 374 | 1 | 1 | 1 | 1 | 2 | 2 | 2 | 1 |
| 214 (111) | 37501 | 375 | 1 | 1 | 1 | 1 | 2 | 2 | 2 | 1 |
| 215 (112) | 37801 | 378 | 1 | 1 | 1 | 1 | 2 | 2 | 2 | 1 |
| 216 (112) | 37802 | 378 | 1 | 1 | 1 | 1 | 2 | 2 | 2 | 1 |
| 217 (112) | 37803 | 378 | 1 | 1 | 1 | 1 | 2 | 2 | 2 | 1 |
| 218 (112) | 37804 | 378 | 1 | 1 | 1 | 1 | 2 | 2 | 2 | 1 |
| 219 (112) | 37805 | 378 | 1 | 1 | 1 | 1 | 2 | 2 | 2 | 1 |
| 220 (113) | 38101 | 381 | 1 | 1 | 1 | 1 | 2 | 2 | 2 | 1 |
| 221 (113) | 38102 | 381 | 1 | 1 | 1 | 1 | 2 | 2 | 2 | 1 |
| 222 (114) | 38501 | 385 | 1 | 1 | 1 | 1 | 2 | 2 | 2 | 1 |
| 223 (115) | 39301 | 393 | 1 | 1 | 1 | 1 | 3 | 2 | 2 | 1 |
| 224 (115) | 39302 | 393 | 1 | 1 | 1 | 1 | 2 | 2 | 2 | 1 |
| 225 (116) | 39601 | 396 | 1 | 1 | 1 | 1 | 2 | 2 | 2 | 1 |
| 226 (116) | 39602 | 396 | 1 | 1 | 1 | 1 | 2 | 2 | 2 | 1 |
| 227 (116) | 39603 | 396 | 1 | 1 | 1 | 1 | 2 | 2 | 2 | 1 |
| 228 (116) | 39604 | 396 | 1 | 1 | 1 | 1 | 2 | 2 | 2 | 1 |
| 229 (116) | 39605 | 396 | 1 | 1 | 1 | 1 | 2 | 2 | 3 | 1 |
| 230 (117) | 39901 | 399 | 1 | 1 | 1 | 1 | 2 | 2 | 2 | 1 |
| 231 (118) | 40001 | 400 | 1 | 1 | 1 | 1 | 2 | 2 | 2 | 1 |
| 232 (119) | 40501 | 405 | 1 | 1 | 1 | 1 | 2 | 2 | 2 | 1 |
| 233 (120) | 40901 | 409 | 1 | 1 | 1 | 1 | 1 | 2 | 2 | 1 |
| 234 (121) | 41301 | 413 | 1 | 1 | 1 | 1 | 2 | 2 | 2 | 1 |
| 235 (121) | 41302 | 413 | 1 | 1 | 1 | 1 | 2 | 2 | 2 | 1 |
| 236 (121) | 41303 | 413 | 1 | 1 | 1 | 1 | 2 | 2 | 2 | 1 |
| 237 (121) | 41304 | 413 | 1 | 1 | 1 | 1 | 2 | 2 | 2 | 1 |
| 238 (121) | 41305 | 413 | 1 | 1 | 1 | 1 | 3 | 2 | 2 | 1 |
| 239 (121) | 41306 | 413 | 1 | 1 | 1 | 1 | 2 | 2 | 2 | 1 |
| 240 (121) | 41307 | 413 | 1 | 1 | 1 | 1 | 2 | 2 | 2 | 1 |
| 241 (121) | 41308 | 413 | 1 | 1 | 1 | 1 | 2 | 2 | 2 | 1 |
| 242 (121) | 41309 | 413 | 1 | 1 | 1 | 1 | 2 | 2 | 2 | 1 |
| 243 (121) | 41310 | 413 | 1 | 1 | 1 | 1 | 2 | 2 | 3 | 1 |
| 244 (121) | 41311 | 413 | 1 | 1 | 1 | 1 | 2 | 2 | 2 | 1 |
| 245 (121) | 41312 | 413 | 1 | 1 | 1 | 1 | 2 | 2 | 2 | 1 |
| 246 (121) | 41313 | 413 | 1 | 1 | 1 | 1 | 2 | 2 | 2 | 1 |
| 247 (121) | 41314 | 413 | 1 | 1 | 1 | 1 | 2 | 2 | 2 | 1 |
| 248 (121) | 41315 | 413 | 1 | 1 | 1 | 1 | 2 | 2 | 2 | 1 |
| 249 (121) | 41316 | 413 | 1 | 1 | 1 | 1 | 2 | 2 | 2 | 1 |
| 250 (121) | 41317 | 413 | 1 | 1 | 1 | 1 | 1 | 2 | 2 | 1 |
| 251 (121) | 41318 | 413 | 1 | 1 | 1 | 1 | 2 | 2 | 2 | 1 |
| 252 (122) | 42601 | 426 | 1 | 1 | 1 | 1 | 2 | 2 | 2 | 1 |
| 253 (123) | 43601 | 436 | 1 | 1 | 1 | 1 | 2 | 2 | 2 | 1 |
| 254 (124) | 43701 | 437 | 1 | 1 | 1 | 1 | 2 | 2 | 2 | 1 |
| 255 (125) | 43901 | 439 | 1 | 1 | 1 | 1 | 1 | 2 | 2 | 1 |
| 256 (126) | 45301 | 453 | 1 | 1 | 1 | 1 | 1 | 2 | 2 | 1 |
| 257 (127) | 45801 | 458 | 1 | 1 | 1 | 1 | 1 | 3 | 2 | 1 |
| 258 (128) | 49901 | 499 | 1 | 1 | 1 | 1 | 1 | 2 | 3 | 1 |
| 259 (129) | 50001 | 500 | 1 | 1 | 1 | 1 | 1 | 2 | 2 | 1 |
| 260 (129) | 50002 | 500 | 1 | 1 | 1 | 1 | 1 | 2 | 2 | 1 |
| 261 (130) | 52001 | 520 | 1 | 1 | 1 | 1 | 1 | 2 | 2 | 1 |
| 262 (131) | 53001 | 530 | 1 | 2 | 1 | 1 | 1 | 1 | 2 | 1 |
| 263 (131) | 53002 | 530 | 1 | 2 | 1 | 1 | 1 | 3 | 2 | 1 |
| 264 (132) | 53301 | 533 | 1 | 1 | 1 | 1 | 2 | 1 | 2 | 1 |
| 265 (133) | 54101 | 541 | 1 | 1 | 1 | 1 | 1 | 2 | 2 | 1 |
| 266 (134) | 54901 | 549 | 1 | 1 | 1 | 1 | 2 | 1 | 2 | 1 |
| 267 (135) | 56501 | 565 | 1 | 1 | 1 | 1 | 2 | 2 | 2 | 1 |
| 268 (136) | 57401 | 574 | 1 | 1 | 1 | 1 | 1 | 2 | 2 | 1 |
| 269 (137) | 58001 | 580 | 1 | 1 | 1 | 1 | 1 | 2 | 2 | 1 |
| 270 (138) | 61601 | 616 | 1 | 1 | 1 | 2 | 2 | 2 | 2 | 1 |
| 271 (139) | 62801 | 628 | 1 | 1 | 1 | 1 | 1 | 2 | 2 | 1 |
| 272 (140) | 63101 | 631 | 1 | 1 | 1 | 1 | 1 | 2 | 2 | 1 |
| 273 (141) | 63401 | 634 | 1 | 1 | 1 | 1 | 1 | 3 | 2 | 1 |
| 274 (142) | 65301 | 653 | 1 | 1 | 1 | 1 | 1 | 2 | 2 | 1 |

The Good Research for Comparative Effectiveness (GRACE) Checklist v5.0 for descriptive studies included in the meta-analysis:

Data:

D1. Were treatment and/or important details of treatment exposure adequately recorded for the study purpose in the data source(s)?

D2. Were the primary outcomes adequately recorded for the study purpose (e.g., available in sufficient detail through data source(s))?

D3. Was the primary clinical outcome(s) measured objectively rather than subject to clinical judgment (e.g., opinion about whether the patient’s condition has improved)?

D4. Were primary outcomes validated, adjudicated, or otherwise known to be valid in a similar population?

D5. Was the primary outcome(s) measured or identified in an equivalent manner between the treatment/ intervention group and the comparison group(s)?

D6. Were important covariates that may be known confounders or effect modifiers available and recorded?

Methods:

M1. Was the study (or analysis) population restricted to new initiators of treatment or those starting a new course of treatment?

M2. If one or more comparison groups were used, were they concurrent comparators? If not, did the authors justify the use of historical comparisons group(s)?

M3. Were important covariates, confounding and effect modifying variables taken into account in the design and/or analysis?

M4. Is the classification of exposed and unexposed person-time free of “immortal time bias”?

M5. Were any meaningful analyses conducted to test key assumptions on which primary results are based?

Answers:

Not enough information = 0

Yes=1

No=2

Table 1b

|  | D1 | D2 | D3 | D4 | D5 | D6 | M1 | M2 | M3 | M4 | M5 |
| --- | --- | --- | --- | --- | --- | --- | --- | --- | --- | --- | --- |
| Pooled 2022 | 1 | 1 | 1 | 1 | 1 | 1 | 1 | 1 | 1 | 2 | 1 |
| Erdem 2012 (143) | 1 | 1 | 1 | 1 | 1 | 1 | 1 | 1 | 1 | 2 | 1 |
| Asadipooya 2011 (144) | 2 | 2 | 1 | 1 | 2 | 2 | 1 | 0 | 2 | 2 | 2 |
| Gul 2008 (145) | 1 | 1 | 1 | 1 | 2 | 2 | 1 | 0 | 2 | 2 | 2 |
| Akdeniz 1998 (146) | 1 | 1 | 1 | 1 | 2 | 2 | 1 | 0 | 2 | 2 | 2 |

References:

1. Patra S, Kalwaje Eshwara V, Pai AR, Varma M, Mukhopadhyay C. Evaluation of clinical, diagnostic features and therapeutic outcome of neurobrucellosis: a case series and review of literature. Int J Neurosci. 2021:1-11.

2. Mahdavi FS, Abbasi Khoshsirat N, Madanipour A. Lumbosacral polyradiculitis associated with brucellosis. IDCases. 2021;23:e01028.

3. Yamout BI, Massouh J, Hushaymi I, Zeineddine M, Saab G. Neurobrucellosis presenting as longitudinally extensive transverse myelitis: A case report and review of the literature. Mult Scler Relat Disord. 2020;40:101947.

4. Kemec Z, Tüzün C, Yıldırım İ. Neurobrucellosis Presented by Cerebral Salt Wasting. Cureus. 2020;12(5):e8275.

5. Havalı C, Çağan E. A rare pediatric case of neurobrucellosis with bilateral optic neuritis. Turk J Pediatr. 2020;62(6):1094-8.

6. Geng L, Feng Y, Li D, Nan N, Ma K, Tang X, et al. Meningoencephalitis, coronary artery and keratitis as an onset of brucellosis: a case report. BMC Infect Dis. 2020;20(1):654.

7. Ata F, Yousaf Z, Sharif MK, Abdallah A. Demyelinating steroid-responsive neurobrucellosis. BMJ Case Rep. 2020;13(3).

8. Abuzinadah AR, Milyani HA, Alshareef A, Bamaga AK, Alshehri A, Kurdi ME. Brucellosis causing subacute motor polyradiculopathy and the pathological correlation of pseudomyopathic electromyography: A case report. Clin Neurophysiol Pract. 2020;5:130-4.

9. Spyrou A, Natsis KS, Papamichalis E, Mourtzinos H. Intraventricular haemorrhage and seizures in a patient with dementia: a case of chronic neurobrucellosis. Age Ageing. 2019;48(4):601-2.

10. Mergen B, Sarici AM, Baltu F, Ozaras R, Adaletli I. An unusual presentation of sixth nerve palsy: neurobrucellosis. GMS Ophthalmol Cases. 2019;9:Doc13.

11. Mehrabian F, Abdi Layaee Z, Ahmadinejad Z. Brucella Shunt Infection as a Rare Presentation of Neurobrucellosis. Case Rep Infect Dis. 2019;2019:7291482.

12. Fatani DF, Alsanoosi WA, Badawi MA, Thabit AK. Ceftriaxone use in brucellosis: A case series. IDCases. 2019;18:e00633.

13. Aziz-Ahari A, Mamishi S, Dadkhah A, Ghazinejadian-Sh FS. Neurobrucellosis in a 9-year-old girl. J Radiol Case Rep. 2019;13(12):13-9.

14. Udugama JMM, Lekamwasam J, Piyasiri DLB, Wijeweera K, Vijayabandara MSK, Wickramasinge DSA. Neurobrucellosis complicated with lumbar epidural abscess; A shepherd’s agony. Ceylon Med J. 2018;63(4):190-1.

15. Shah IA, Kawoos Y, Sanai BA, Rabyang S, Banday D. Neurobrucellosis Presenting as Acute Psychosis. J Neurosci Rural Pract. 2018;9(4):644-6.

16. Rossi M, Tascini C, Carannante N, Di Caprio G, Sofia S, Iacobello C. Neurobrucellosis: diagnostic and clinical management of an atypical case. New Microbiol. 2018;41(2):165-7.

17. Nashi S, Preethish-Kumar V, Maji S, Chandrashekar N, Polavarapu K, Kashinkunti C, et al. Case Report: Neurobrucellosis with Plastered Spinal Arachnoiditis: A Magnetic Resonance Imaging-Based Report. Am J Trop Med Hyg. 2018;98(3):800-2.

18. Mohammadzadeh V, Akbarieh S, Ghoreishi SA, Jozpanahi M. Neurobrucellosis with intramedullary spinal cord involvement: A case report. Iran J Neurol. 2018;17(3):152-3.

19. Dias SP, Sequeira J, Almeida M. Spastic paraparesis and sensorineural hearing loss: keep brucellosis in mind. J Neurol Sci. 2018;385:144-5.

20. Bains R, Dahhan T, Belzowski A, Heinze ER, Wong AL, Clements PJ. An Interesting Case of Neurobrucellosis Mimicking Neuropsychiatric Lupus. Case Rep Rheumatol. 2018;2018:9793535.

21. Zhang J, Chen Z, Xie L, Zhao C, Zhao H, Fu C, et al. Treatment of a subdural empyema complicated by intracerebral abscess due to Brucella infection. Braz J Med Biol Res. 2017;50(5):e5712.

22. Tzur A, Sedaka Y, Fruchtman Y, Leibovitz E, Cavari Y, Noyman I, et al. Rapidly Progressing Fatal Neurobrucellosis in a Healthy Child in an Endemic Area in Southern Israel. Isr Med Assoc J. 2017;19(2):125-7.

23. Pendela SV, Agrawal N, Mathew T, Vidyasagar S, Kudaravalli P. An Uncommon Presentation of Brucella Endocarditis Masquerading as Neurobrucellosis. J Clin Diagn Res. 2017;11(2):Od10-od1.

24. Ibrahimagić O, Smajlović D, Dostović Z, Iljazović A, Kojić B, Zonić L. Neurobrucellosis and cerebral venous sinus thrombosis: a case report. Acta Clin Belg. 2017;72(5):343-5.

25. Gündüz T, Tektürk PT, Yapıcı Z, Kürtüncü M, Somer A, Törün SH, et al. Characteristics of isolated spinal cord involvement in neurobrucellosis with no corresponding MRI activity: A case report and review of the literature. J Neurol Sci. 2017;372:305-6.

26. Farhan N, Khan EA, Ahmad A, Ahmed KS. Neurobrucellosis: A report of two cases. J Pak Med Assoc. 2017;67(11):1762-3.

27. Dar W, Latief M, Dar I, Sofi N. Meningitis, polyradiculopathy, and optic nerve involvement in neurobrucellosis: A rare clinical presentation. Neurol India. 2017;65(5):1142-4.

28. Alqwaifly M, Al-Ajlan FS, Al-Hindi H, Al Semari A. Central Nervous System Brucellosis Granuloma and White Matter Disease in Immunocompromised Patient. Emerg Infect Dis. 2017;23(6):978-81.

29. Akcay H, Kurtuncu M, Celik SY, Gunduz T, Eraksoy M. Neurobrucellosis presenting with mania. Acta Neurol Belg. 2017;117(1):373-5.

30. Yilmaz S, Avcu G, Beyazal M, Arslan M. A rare cause of seizures: brucellar brain abscess. Braz J Infect Dis. 2016;20(3):310-1.

31. Sudhamshu KC, Kumar AR, Dias M, Shubha AM, Das K. Neurobrucellosis Infection of Ventriculoperitoneal Shunt Presenting as Peritonitis. Indian J Pediatr. 2016;83(9):1024.

32. Raina S, Sharma A, Sharma R, Bhardwaj A. Neurobrucellosis: A Case Report from Himachal Pradesh, India, and Review of the Literature. Case Rep Infect Dis. 2016;2016:2019535.

33. Oueslati I, Berriche A, Ammari L, Abdelmalek R, Kanoun F, Kilani B, et al. Epidemiological and clinical characteristics of neurobrucellosis case patients in Tunisia. Med Mal Infect. 2016;46(3):123-30.

34. Mahajan SK, Sharma A, Kaushik M, Raina R, Sharma S, Banyal V. Neurobrucellosis: an often forgotten cause of chronic meningitis. Trop Doct. 2016;46(1):54-6.

35. Khademi A, Poursadeghfard M, Nikandish Noubar R. Neurobrucellosis Presented with a Hyperacute Onset: A Case Report. Iran J Public Health. 2016;45(12):1652-5.

36. Bayhan GI, Ece I, Oner AF. Brucellar Aortitis and Meningoencephalitis in an Adolescent. Pediatr Infect Dis J. 2016;35(12):1368-70.

37. Bajin MD, Savaş Ö, Aslan F, Sennaroğlu L. Cochlear Implantation in Neurobrucellosis. Balkan Med J. 2016;33(1):108-11.

38. Teke TA, Koyuncu H, Oz FN, Metin O, Bayhan GI, Aydın ZG, et al. Neurobrucellosis in children: Case series from Turkey. Pediatr Int. 2015;57(4):578-81.

39. Kim EJ, Lee SJ, Ahn EY, Ryu DG, Choi YH, Kim TH. Relapsed Brucellosis Presenting as Neurobrucellosis with Cerebral Vasculitis in a Patient Previously Diagnosed with Brucellar Spondylitis: A Case Report. Infect Chemother. 2015;47(4):268-71.

40. Tufan K, Aydemir F, Sarica FB, Kursun E, Kardes Ö, Cekinmez M, et al. A extremely rare case of cervical intramedullary granuloma due to Brucella accompanied by Chiari Type-1 malformation. Asian J Neurosurg. 2014;9(3):173-6.

41. Tajdini M, Akbarloo S, Hosseini SM, Parvizi B, Baghani S, Aghamollaii V, et al. From a simple chronic headache to neurobrucellosis: a case report. Med J Islam Repub Iran. 2014;28:12.

42. Kesav P, Vishnu VY, Khurana D. Fatal disseminated neurobrucellosis. Qjm. 2014;107(4):321-2.

43. Kanık-Yüksek S, Gülhan B, Ozkaya-Parlakay A, Tezer H. A case of childhood Brucellosis with neurological involvement and epididymo-orchitis. J Infect Dev Ctries. 2014;8(12):1636-8.

44. Amiri RS, Hanif H, Ahmadi A, Amirjamshidi A. Brucella-related multiple cerebral aneurysms: Report of a case and review of the literature. Surg Neurol Int. 2014;5:152.

45. Al-Otaibi A, Almuneef M, Shaalan MA. Brucella melitensis infection of ventriculo-peritoneal shunt: A form of neurobrucellosis manifested as gastrointestinal symptoms. J Infect Public Health. 2014;7(1):62-5.

46. A Rare presentation of neurobrucellosis in a child with Recurrent transient ischemic attacks and pseudotumor cerebri (A case report and review of literature). Iran J Child Neurol. 2014;8(2):65-9.

47. Kesav P, Modi M, Singla V, Khurana D, Prabhakar S. Kaleidoscopic presentation of neurobrucellosis. J Neurol Sci. 2013;331(1-2):165-7.

48. Bektaş O, Ozdemir H, Yılmaz A, Fitöz S, Ciftçi E, Ince E, et al. An unusual case of neurobrucellosis presenting as demyelination disorder. Turk J Pediatr. 2013;55(2):210-3.

49. Abdinia B, Barzegar M, Malaki M, Behbod H, Oskoui S. Association of Brucella meningoencephalitis with cerebrospinal fluid shunt in a child: a case report. Iran J Child Neurol. 2013;7(1):35-8.

50. Sinopidis X, Kaleyias J, Mitropoulou K, Triga M, Kothare SV, Mantagos S. An uncommon case of pediatric neurobrucellosis associated with intracranial hypertension. Case Rep Infect Dis. 2012;2012:492467.

51. Karsen H, Tekin Koruk S, Duygu F, Yapici K, Kati M. Review of 17 cases of neurobrucellosis: clinical manifestations, diagnosis, and management. Arch Iran Med. 2012;15(8):491-4.

52. Işıkay S, Yılmaz K, Ölmez A. Neurobrucellosis developing unilateral oculomotor nerve paralysis. Am J Emerg Med. 2012;30(9):2085.e5-7.

53. Erdem M, Namiduru M, Karaoglan I, Kecik VB, Aydin A, Tanriverdi M. Unusual presentation of neurobrucellosis: a solitary intracranial mass lesion mimicking a cerebral tumor : a case of encephalitis caused by Brucella melitensis. J Infect Chemother. 2012;18(5):767-70.

54. Calik M, Iscan A, Gul M, Derme T, Cece H, Torun MF. Severe neurobrucellosis in a young infant. Clin Neurol Neurosurg. 2012;114(7):1046-8.

55. Budnik I, Fuchs I, Shelef I, Krymko H, Greenberg D. Unusual presentations of pediatric neurobrucellosis. Am J Trop Med Hyg. 2012;86(2):258-60.

56. Yilmaz S, Serdaroglu G, Gokben S, Tekgul H. A case of neurobrucellosis presenting with isolated intracranial hypertension. J Child Neurol. 2011;26(10):1316-8.

57. Marques R, Martins C, Machado I, Monteiro JP, Campos N, Calhau P. Unilateral optic neuritis as a presentation of neurobrucellosis. Pediatr Rep. 2011;3(2):e11.

58. Kaya O, Avşar K, Zeynep Akçam F. Unusual manifestations of brucellosis. Arch Med Sci. 2011;7(1):173-5.

59. Jabbour RA, Tabbarah Z. Neurobrucellosis presenting with hearing loss, gait disturbances and diffuse white matter disease on brain magnetic resonance imaging (MRI). J Med Liban. 2011;59(2):105-8.

60. Altekin RE, Karakas MS, Yanikoglu A, Ozbek SC, Akdemir B, Demirtas H, et al. Aortic valve endocarditis and cerebral mycotic aneurysm due to brucellosis. J Cardiol Cases. 2011;4(3):e179-e82.

61. Al Ayed MS. Neurobrucellosis in children, a report of 2 cases. Int J Health Sci (Qassim). 2011;5(1):81-4.

62. Türel O, Sanli K, Hatipoğlu N, Aydoğmuş C, Hatipoğlu H, Siraneci R. Acute meningoencephalitis due to Brucella: case report and review of neurobrucellosis in children. Turk J Pediatr. 2010;52(4):426-9.

63. Tekin-Koruk S, Duygu F, Gursoy B, Karaagac L, Bayraktar M. A rare case of seronegative neurobrucellosis. Ann Saudi Med. 2010;30(5):412-4.

64. Sturniolo G, Mondello P, Bruno S, Bonfatto OE, Frattima S, Albanese A, et al. Neurobrucellosis associated with syndrome of inappropriate antidiuretic hormone with resultant diabetes insipidus and hypothyroidism. J Clin Microbiol. 2010;48(10):3806-9.

65. Inan AS, Ceran N, Erdem I, Engin DO, Senbayrak S, Ozyurek SC, et al. Neurobrucellosis with transient ischemic attack, vasculopathic changes, intracerebral granulomas and basal ganglia infarction: a case report. J Med Case Rep. 2010;4:340.

66. Ay S, Tur BS, Kutlay S. Cerebral infarct due to meningovascular neurobrucellosis: a case report. Int J Infect Dis. 2010;14 Suppl 3:e202-4.

67. Altas M, Evirgen O, Arica V, Tutanc M. Pediatric neurobrucellosis associated with hydrocephalus. J Pediatr Neurosci. 2010;5(2):144-6.

68. Tonekaboni SH, Karimi A, Armin S, Khase LA, Sabertehrani AS. Neurobrucellosis: a partially treatable cause of vision loss. Pediatr Neurol. 2009;40(5):401-3.

69. Sahin E, Yilmaz A, Ersöz G, Uğuz M, Kaya A. Multiple cranial nerve involvement caused by Brucella melitensis. South Med J. 2009;102(8):855-7.

70. Ozkavukcu E, Tuncay Z, Selçuk F, Erden I. An unusual case of neurobrucellosis presenting with unilateral abducens nerve palsy: clinical and MRI findings. Diagn Interv Radiol. 2009;15(4):236-8.

71. Mansour AM, Nakhla, II, Sultan YA, Frenck RW, Jr. Brucella meningitis: first reported case in Egypt. East Mediterr Health J. 2009;15(4):1040-4.

72. Guneri EA, Kirkim G, Serbetcioglu BM, Erdag TK, Guneri A. Cochlear implantation in neurobrucellosis. Otol Neurotol. 2009;30(6):747-9.

73. Tikare NV, Mantur BG, Bidari LH. Brucellar meningitis in an infant--evidence for human breast milk transmission. J Trop Pediatr. 2008;54(4):272-4.

74. Karaoglan I, Namiduru M, Akcali A, Cansel N. Different manifestations of nervous system involvement by neurobrucellosis. Neurosciences (Riyadh). 2008;13(3):283-7.

75. Karaoglan I, Akcali A, Ozkur A, Namýdurua M. Neurobrucellosis mimicking demyelinizating disorders. Ann Saudi Med. 2008;28(2):148-9.

76. Jochum T, Kliesch U, Both R, Leonhardi J, Bär KJ. Neurobrucellosis with thalamic infarction: a case report. Neurol Sci. 2008;29(6):481-3.

77. Guney F, Gumus H, Ogmegul A, Kandemir B, Emlik D, Arslan U, et al. First case report of neurobrucellosis associated with hydrocephalus. Clin Neurol Neurosurg. 2008;110(7):739-42.

78. Gul HC, Erdem H, Gorenek L, Ozdag MF, Kalpakci Y, Avci IY, et al. Management of neurobrucellosis: an assessment of 11 cases. Intern Med. 2008;47(11):995-1001.

79. Bilen S, Güneş HN, Saka M, Ak F. Four different clinical manifestations of neurobrucellosis (case reports). Eur J Intern Med. 2008;19(8):e75-7.

80. Nas K, Tasdemir N, Cakmak E, Kemaloglu MS, Bukte Y, Geyik MF. Cervical intramedullary granuloma of Brucella: a case report and review of the literature. Eur Spine J. 2007;16 Suppl 3(Suppl 3):255-9.

81. Miyares FR, Deleu D, ElShafie SS, Equia F, Mesraoua B, Al Hail H, et al. Irreversible papillitis and ophthalmoparesis as a presenting manifestation of neurobrucellosis. Clin Neurol Neurosurg. 2007;109(5):439-41.

82. Karaca S, Demiroglu YZ, Karataş M, Tan M. Acquired progressive spastic paraparesis due to neurobrucellosis: a case report. Acta Neurol Belg. 2007;107(4):118-21.

83. Yetkin MA, Bulut C, Erdinc FS, Oral B, Tulek N. Evaluation of the clinical presentations in neurobrucellosis. Int J Infect Dis. 2006;10(6):446-52.

84. Tena D, González-Praetorius A, López-Alonso A, Peña JL, Pérez-Pomata MT, Bisquert J. Acute meningitis due to Brucella spp. Eur J Pediatr. 2006;165(10):726-7.

85. Miguel PS, Fernández G, Vasallo FJ, Hortas M, Lorenzo JR, Rodríguez I, et al. Neurobrucellosis mimicking cerebral tumor: case report and literature review. Clin Neurol Neurosurg. 2006;108(4):404-6.

86. Keihani-Douste Z, Daneshjou K, Ghasemi M. A quadriplegic child with multiple brain abscesses: case report of neurobrucellosis. Med Sci Monit. 2006;12(12):Cs119-22.

87. Karakurum Goksel B, Yerdelen D, Karatas M, Pelit A, Demiroglu YZ, Kizilkilic O, et al. Abducens nerve palsy and optic neuritis as initial manifestation in brucellosis. Scand J Infect Dis. 2006;38(8):721-5.

88. Cagatay A, Karadeniz A, Ozsut H, Eraksoy H, Calangu S. Hearing loss in patient with neurobrucellosis. South Med J. 2006;99(11):1305-6.

89. Bingöl A, Togay-Işikay C. Neurobrucellosis as an exceptional cause of transient ischemic attacks. Eur J Neurol. 2006;13(5):544-8.

90. Adaletli I, Albayram S, Gurses B, Ozer H, Yilmaz MH, Gulsen F, et al. Vasculopathic changes in the cerebral arterial system with neurobrucellosis. AJNR Am J Neuroradiol. 2006;27(2):384-6.

91. Vajramani GV, Nagmoti MB, Patil CS. Neurobrucellosis presenting as an intra-medullary spinal cord abscess. Ann Clin Microbiol Antimicrob. 2005;4:14.

92. Levy J, Shneck M, Marcus M, Lifshitz T. Brucella meningitis and papilledema in a child. Eur J Ophthalmol. 2005;15(6):818-20.

93. Krishnan C, Kaplin AI, Graber JS, Darman JS, Kerr DA. Recurrent transverse myelitis following neurobrucellosis: immunologic features and beneficial response to immunosuppression. J Neurovirol. 2005;11(2):225-31.

94. Kizilkilic O, Turunc T, Yildirim T, Demiroglu YZ, Hurcan C, Uncu H. Successful medical treatment of intracranial abscess caused by Brucella spp. J Infect. 2005;51(1):77-80.

95. Ozisik HI, Ersoy Y, Refik Tevfik M, Kizkin S, Ozcan C. Isolated intracranial hypertension: a rare presentation of neurobrucellosis. Microbes Infect. 2004;6(9):861-3.

96. Hatipoglu CA, Yetkin A, Ertem GT, Tulek N. Unusual clinical presentations of brucellosis. Scand J Infect Dis. 2004;36(9):694-7.

97. Gündeş S, Meriç M, Willke A, Erdenliğ S, Koç K. A case of intracranial abscess due to Brucella melitensis. Int J Infect Dis. 2004;8(6):379-81.

98. Al-Sous MW, Bohlega S, Al-Kawi MZ, Alwatban J, McLean DR. Neurobrucellosis: clinical and neuroimaging correlation. AJNR Am J Neuroradiol. 2004;25(3):395-401.

99. Ulas UH, Hamamcioglu K, Eroglu E, Odabasi Z, Alanoglu E, Demirkaya S, et al. Paraplegia associated with brucellosis involving the anterior lumbrosacral nerve roots. J Peripher Nerv Syst. 2003;8(1):8-12.

100. Solaroglu I, Kaptanoglu E, Okutan O, Beskonakli E. Solitary extra-axial posterior fossa abscess due to neurobrucellosis. J Clin Neurosci. 2003;10(6):710-2.

101. Koussa S, Chemaly R. Neurobrucellosis presenting with diffuse cerebral white matter lesions. Eur Neurol. 2003;50(2):121-3.

102. Yilmaz M, Ozaras R, Ozturk R, Mert A, Tabak F, Aktuglu Y. Epileptic seizure: an atypical presentation in an adolescent boy with neurobrucellosis. Scand J Infect Dis. 2002;34(8):623-5.

103. Wallach JC, Baldi PC, Fossati CA. Clinical and diagnostic aspects of relapsing meningoencephalitis due to Brucella suis. Eur J Clin Microbiol Infect Dis. 2002;21(10):760-2.

104. Novati R, Viganò MG, de Bona A, Nocita B, Finazzi R, Lazzarin A. Neurobrucellosis with spinal cord abscess of the dorsal tract: a case report. Int J Infect Dis. 2002;6(2):149-50.

105. Arévalo Lorido JC, Carretero Gómez J, Romero Requena J, Bureo Dacal JC, Vera Tomé A, Bureo Dacal P. Brucellar spondylitis and meningoencephalitis: a case report. Neth J Med. 2001;59(3):158-60.

106. Trifiletti RR, Restivo DA, Pavone P, Giuffrida S, Parano E. Diabetes insipidus in neurobrucellosis. Clin Neurol Neurosurg. 2000;102(3):163-5.

107. Zaidan R, Al Tahan AR. Cerebral venous thrombosis: a new manifestation of neurobrucellosis. Clin Infect Dis. 1999;28(2):399-400.

108. Güven MB, Cirak B, Kutluhan A, Ugras S. Pituitary abscess secondary to neurobrucellosis. Case illustration. J Neurosurg. 1999;90(6):1142.

109. Locutura J, Lorenzo JF, Miján A, Galdós-Barroso M, Saez-Royuela F. Non-simultaneous Brucella peritonitis and meningitis in a patient with a ventriculoperitoneal shunt. Eur J Clin Microbiol Infect Dis. 1998;17(5):361-2.

110. Habeeb YK, Al-Najdi AK, Sadek SA, Al-Onaizi E. Paediatric neurobrucellosis: case report and literature review. J Infect. 1998;37(1):59-62.

111. Ciftçi E, Erden I, Akyar S. Brucellosis of the pituitary region: MRI. Neuroradiology. 1998;40(6):383-4.

112. Akdeniz H, Irmak H, Anlar O, Demiröz AP. Central nervous system brucellosis: presentation, diagnosis and treatment. J Infect. 1998;36(3):297-301.

113. Omar FZ, Zuberi S, Minns RA. Neurobrucellosis in childhood: six new cases and a review of the literature. Dev Med Child Neurol. 1997;39(11):762-5.

114. Shoshan Y, Maayan S, Gomori MJ, Israel Z. Chronic subdural empyema: a new presentation of neurobrucellosis. Clin Infect Dis. 1996;23(2):400-1.

115. Estevão MH, Barosa LM, Matos LM, Barroso AA, da Mota HC. Neurobrucellosis in children. Eur J Pediatr. 1995;154(2):120-2.

116. al-Eissa YA. Clinical and therapeutic features of childhood neurobrucellosis. Scand J Infect Dis. 1995;27(4):339-43.

117. Yaşar Anlar F, Yalçin S, Seçmeer G. Persistent hypoglycorrhachia in neurobrucellosis. Pediatr Infect Dis J. 1994;13(8):747-8.

118. Santini C, Baiocchi P, Berardelli A, Venditti M, Serra P. A case of brain abscess due to Brucella melitensis. Clin Infect Dis. 1994;19(5):977-8.

119. Thomas R, Kameswaran M, Murugan V, Okafor BC. Sensorineural hearing loss in neurobrucellosis. J Laryngol Otol. 1993;107(11):1034-6.

120. al-Eissa YA. Unusual suppurative complications of brucellosis in children. Acta Paediatr. 1993;82(11):987-92.

121. McLean DR, Russell N, Khan MY. Neurobrucellosis: clinical and therapeutic features. Clin Infect Dis. 1992;15(4):582-90.

122. Chowdhary UM, Twum-Danso K. Brucella meningoencephalitis associated with cerebrospinal fluid shunt in a child: case report. Surg Neurol. 1991;35(6):468-70.

123. Challoner KR, Riley KB, Larsen RA. Brucella meningitis. Am J Emerg Med. 1990;8(1):40-2.

124. Bucher A, Gaustad P, Pape E. Chronic neurobrucellosis due to Brucella melitensis. Scand J Infect Dis. 1990;22(2):223-6.

125. Wen H, Jin D, Cai L, Wu T, Liu H. Neurobrucellosis with ischemic stroke and spinal cord involvement: a case report. BMC Neurol. 2021;21(1):129.

126. Díaz-Vintimilla JJ, Rosales Hernández LA, Zapata-Arenas R, Sánchez-Montes S, Becker I. Subacute transverse myelitis as a clinical presentation of neurobrucellosis. J Infect Dev Ctries. 2021;15(9):1359-63.

127. Al-Qarhi R, Al-Dabbagh M. Brucella Shunt Infection Complicated by Peritonitis: Case Report and Review of the Literature. Infect Dis Rep. 2021;13(2):367-76.

128. AlNahhas OF, Menezes GA, Alkheder KA, Al Khafaji Y, Javid N. Neurobrucellosis related to the consumption of unpasteurized camel milk in Ras Al Khaimah, United Arab Emirates. J Pure Appl Microbiol. 2020;14(1):183-7.

129. Akçam FZ, Akçam M, Yılmaz M, Temel EN, Kaya O, Yılmaz GR. Neurobrucellosis: Two cases, two different presentation. Turk Noroloji Derg. 2020;26(4):342-5.

130. Aghamollaii V, Ahmadinejad Z, Mohammadian F, Mirsepassi Z. Catatonic state as a rare presentation of neurobrucellosis: A case report. Iran J Psychiatr Behav Sci. 2019;13(3).

131. Oozer G, Kutlu G, Inan LE. A Rare Clinical Presentation of Neurobrucellosis Paraparesis: A Report of two Cases. Eurasian J Med Oncol. 2018;2(4):254-7.

132. Mohammed W, Al Sous MW. Neurobrucellosis: Unusual Cause of Stroke in a Young Patient. Neurology. 2018;90:2.

133. Yang XY, Liu XL, Li WS, Chen DW, Ma CY. Neurobrucellosis presenting as a pituitary abscess: a case report and review of literature. Int J Clin Exp Med. 2017;10(6):9669-74.

134. Köse H, Temoçin F, Temoçin S. Neurobrucellosis accompanied by sternoclavicular arthritis: A case report. Haseki Tip Bulteni. 2017;55(4):322-4.

135. Yasin M, Moghtader Mojdehi AH. Acute neurobrucellosis: Syndrome of inappropriate antidiuretic hormone secretion and parkinsonism presentation. Arch Clin Infect Dis. 2014;9(3).

136. Gurler S, Kutluhan S, Kaya O, Tığ UŞ, Akpınar O, Karabacak M, et al. A case of neurobrucellosis that mimicks increased intracranial hypertension syndrome. Turk Noroloji Derg. 2014;20(4):132-4.

137. Oz FN, Tanir G, Simsek G, Kaya NG, Akin I. A case of underdiagnosed brucella meningitis presented with hearing loss. Infect Dis Clin Pract. 2013;21(2):136-8.

138. Sathyanarayanan V, Ragini B, Razak A, Prabhu MMP. Brucella meningoencephalitis with hydrocephalus masquerading as tuberculosis. Asian Pac J Trop Med. 2010;3(10):835-7.

139. Turkoglu R, Ceran N, Gencer M, Tutkavul K, Tireli H. Neurobrucellosis mimicking demyelinating disease. Mult Scler. 2008;14:S224-S5.

140. Mohsenpour B, Khomand P, Ghaderi E. Neurobrucellosis: Report of a case with CVA manifestation. Pak J Med Sci. 2008;24(4):614-7.

141. Ghaffarinejad A, Sarafzadeh F, Sedighi B, Sadeghieh T. Psychosis as an early presentation of neuro-brucellosis. Iran J Med Sci. 2008;33(1):57-9.

142. Helvaci M, Kasirga E, Çetin N, Yaprak I. Intramedullary spinal cord abscess suspected of Brucella infection. Pediatr Int. 2002;44(4):446-8.

143. Erdem H, Ulu-Kilic A, Kilic S, Karahocagil M, Shehata G, Eren-Tulek N, et al. Efficacy and tolerability of antibiotic combinations in neurobrucellosis: results of the Istanbul study. Antimicrob Agents Chemother. 2012;56(3):1523-8.

144. Asadipooya K, Dehghanian A, Omrani GH, Abbasi F. Short-course treatment in neurobrucellosis: a study in Iran. Neurol India. 2011;59(1):101-3.

145. Gul HC, Erdem H, Gorenek L, Ozdag MF, Kalpakci Y, Avc1 sYa, et al. Management of neurobrucellosis: an assessment of 11 cases. Internal medicine. 2008;47 11:995-1001.

146. Akdeniz H, Irmak H, Anlar Ö, Demiröz AP. Central nervous system brucellosis: Presentation, diagnosis and treatment. Journal of Infection. 1998;36(3):297-301.
